# Supplementary material
Source: PubMed Central journal article supplement (PMC7982379)
Supplement: 13280_2020_1415_MOESM1_ESM.pdf [file 13280_2020_1415_MOESM1_ESM.pdf]

***Ambio***

**Electronic Supplementary Material**

This supplementary material has not been peer reviewed.

Title: **Why European biodiversity reporting is not reliable**

**Jana-Sophie Ette, Thomas Geburek**

| country         | Socioeconomics    |               |                           |              |            | Geography               |               |                         |                           |             |                 |                       |
|-----------------|-------------------|---------------|---------------------------|--------------|------------|-------------------------|---------------|-------------------------|---------------------------|-------------|-----------------|-----------------------|
|                 | population [2017] | pop. density* | GDP per capita [2016/USD] | EU accession | size [km2] | biogeographical regions | mean latitude | land border length [km] | coast boarder length [km] | isolation** | forest area [%] | agricultural area [%] |
| Albania         | 2930187           | 101.9         | 11840                     | not member   | 28748      | ALP, MED                | 41 00 N       | 720                     | 362                       | 0.67        | 28.2            | 42.9                  |
| Andorra         | 76965             | 164.5         | 37231                     | not member   | 468        | ALP                     | 42 30 N       | 120                     | 0                         | 1.00        | 34.0            | 40.0                  |
| Austria         | 8823054           | 105.2         | 48005                     | 1995         | 83879      | ALP, CON                | 47 20 N       | 2562                    | 0                         | 1.00        | 46.9            | 32.9                  |
| Belgium         | 11429336          | 351.2         | 45047                     | 1958         | 32545      | ALP, CON                | 50 50 N       | 1385                    | 67                        | 0.95        | 22.6            | 43.9                  |
| Bosnia          | 3507017           | 68.6          | 10958                     | not member   | 51129      | ALP, MED, CON           | 44 00 N       | 1459                    | 20                        | 0.99        | 42.7            | 42.6                  |
| Bulgaria        | 7084571           | 63.8          | 20327                     | 2007         | 110994     | ALP, BLS                | 43 00 N       | 1808                    | 354                       | 0.84        | 35.2            | 46.2                  |
| Croatia         | 4189353           | 74.1          | 22795                     | 2013         | 56542      | ALP, MED                | 45 10 N       | 2197                    | 5835                      | 0.27        | 34.3            | 27.5                  |
| Cyprus          | 854802            | 92.4          | 21300                     | 2004         | 9251       | MED                     | 35 00 N       | 152                     | 648                       | 0.19        | 18.7            | 13.8                  |
| Czech Republic  | 10618303          | 134.6         | 33232                     | 2004         | 78866      | CON, PAN                | 49 45 N       | 1881                    | 0                         | 1.00        | 34.5            | 54.6                  |
| Denmark         | 5733551           | 133.2         | 47985                     | 1973         | 43048      | ATL, CON                | 56 00 N       | 68                      | 7314                      | 0.01        | 14.6            | 62.2                  |
| Estonia         | 1309632           | 29.0          | 29313                     | 2004         | 45227      | BOR                     | 59 00 N       | 633                     | 3794                      | 0.14        | 52.7            | 23.4                  |
| Finland         | 5523231           | 16.3          | 32165                     | 1995         | 338144     | ALP, BOR                | 64 00 N       | 2690                    | 1250                      | 0.68        | 73.1            | 7.5                   |
| France          | 64979548          | 119.5         | 42314                     | 1958         | 543965     | ALP, ATL, CON, MED      | 46 00 N       | 2889                    | 3427                      | 0.46        | 31.0            | 52.5                  |
| Germany         | 82114224          | 229.9         | 48111                     | 1958         | 357121     | AL, ATL, CON            | 51 00 N       | 3621                    | 2389                      | 0.60        | 32.7            | 48.0                  |
| Greece          | 11159773          | 84.6          | 26669                     | 1981         | 131957     | MED                     | 39 00 N       | 1228                    | 13676                     | 0.08        | 31.5            | 60.4                  |
| Hungary         | 9721559           | 104.5         | 27482                     | 2004         | 93030      | PAN                     | 47 00 N       | 2171                    | 0                         | 1.00        | 22.9            | 59.1                  |
| Ireland         | 4761657           | 67.8          | 69231                     | 1973         | 70273      | ATL                     | 53 00 N       | 499                     | 1448                      | 0.26        | 10.9            | 64.3                  |
| Italy           | 59359900          | 197.0         | 36833                     | 1958         | 301336     | ALP, CON, MED           | 42 50 N       | 1932                    | 7600                      | 0.20        | 31.6            | 44.0                  |
| Latvia          | 1949670           | 30.2          | 25710                     | 2004         | 64589      | BOR                     | 57 00 N       | 1150                    | 498                       | 0.70        | 54.0            | 30.3                  |
| Liechtenstein   | 37922             | 237.0         | 168146                    | not member   | 160        | CON                     | 47 10 N       | 76                      | 0                         | 1.00        | 43.1            | 32.3                  |
| Lithuania       | 2890297           | 44.3          | 29972                     | 2004         | 65301      | BOR                     | 56 00 N       | 1273                    | 90                        | 0.93        | 34.8            | 48.0                  |
| Luxembourg      | 583445            | 225.6         | 104003                    | 1958         | 2586       | CON                     | 49 45 N       | 359                     | 0                         | 1.00        | 33.5            | 50.7                  |
| Macedonia       | 2083160           | 81.0          | 14579                     | not member   | 25713      | CON, ALP                | 41 50 N       | 766                     | 0                         | 1.00        | 39.6            | 50.1                  |
| Malta           | 430835            | 1363.4        | 39834                     | 2004         | 316        | MED                     | 35 50 N       | 0                       | 197                       | 0.00        | 1.1             | 32.0                  |
| Moldava         | 4051212           | 119.9         | 5328                      | not member   | 33800      | CON, STE                | 47 00 N       | 1389                    | 0                         | 1.00        | 12.4            | 74.8                  |
| Monaco          | 38695             | 19155.9       | 162009                    | not member   | 2.02       | MED                     | 43 44 N       | 4.4                     | 4.1                       | 0.52        | 0.0             | 0.0                   |
| Montenegro      | 628960            | 45.5          | 16643                     | not member   | 13812      | ALP, MED                | 42 30 N       | 625                     | 294                       | 0.68        | 61.5            | 17.2                  |
| Norway          | 5305383           | 16.4          | 69249                     | not member   | 323759     | ALP, ATL, AR            | 62 00 N       | 2551                    | 25148                     | 0.09        | 33.2            | 2.7                   |
| Poland          | 38170712          | 122.1         | 27764                     | 2004         | 312685     | ALP, CON                | 52 00 N       | 2788                    | 440                       | 0.86        | 30.8            | 46.9                  |
| Portugal        | 10329506          | 111.9         | 28933                     | 1986         | 92345      | ATL, MAC, MED           | 39 30 N       | 1214                    | 1793                      | 0.40        | 34.7            | 40.4                  |
| Romania         | 19679306          | 82.6          | 22348                     | 2007         | 238391     | ALP, BLS, CON, PAN, STE | 46 00 N       | 2508                    | 225                       | 0.92        | 29.8            | 60.1                  |
| San Marino      | 33400             | 547.5         | 59058                     | not member   | 61         | CON                     | 43 46 N       | 39                      | 0                         | 1.00        | 0.0             | 16.7                  |
| Serbia          | 7058322           | 79.6          | 14493                     | not member   | 88631      | ALP, CON, PAN           | 44 00 N       | 2027                    | 0                         | 1.00        | 31.1            | 39.7                  |
| Slovakia        | 5447662           | 111.1         | 31339                     | 2004         | 49034      | ALP, PAN                | 48 40 N       | 1524                    | 0                         | 1.00        | 40.3            | 40.0                  |
| Slovenia        | 2079976           | 102.7         | 32085                     | 2004         | 20253      | ALP, CON                | 46 00 N       | 1334                    | 47                        | 0.97        | 62.0            | 30.0                  |
| Spain           | 46354321          | 91.9          | 36416                     | 1986         | 504654     | ALP, ATL, MAC, MED      | 40 00 N       | 1918                    | 4964                      | 0.28        | 38.2            | 52.5                  |
| Sweden          | 9910701           | 22.0          | 49836                     | 1995         | 449964     | ALP, BOR, CON           | 62 00 N       | 2233                    | 3218                      | 0.41        | 68.9            | 7.5                   |
| Switzerland     | 8476005           | 205.3         | 59561                     | not member   | 41285      | ALP, CON                | 47 00 N       | 1852                    | 0                         | 1.00        | 31.7            | 38.2                  |
| The Netherlands | 17035938          | 410.2         | 51949                     | 1958         | 41526      | ATL                     | 52 30 N       | 1027                    | 451                       | 0.69        | 11.2            | 54.5                  |
| Turkey          | 9799745           | 419.1         | 24912                     | not member   | 23384      | BLS, ANA, MED           | 39 00 N       | 2648                    | 7200                      | 0.27        | 27.2            | 50.1                  |
| U.K.            | 66181585          | 272.5         | 42481                     | 1973         | 242910     | ATL, MED                | 51 30 N       | 499                     | 12429                     | 0.04        | 13.0            | 70.8                  |
| Ukraine         | 44222947          | 73.3          | 8305                      | not member   | 603700     | ALP, CON, STE           | 49 00 N       | 4663                    | 2782                      | 1.60        | 16.7            | 71.3                  |

\* annotation: pop.density = population/size

\*\*annotation: isolation= coast boarder length/ whole border length

#### Sources of information:

|                          |                                                                                                                                                                                                                                                                                         |
|--------------------------|-----------------------------------------------------------------------------------------------------------------------------------------------------------------------------------------------------------------------------------------------------------------------------------------|
| country size:            | <a href="https://de.wikipedia.org/wiki/Liste_der_L%C3%A4nder_Europas">https://de.wikipedia.org/wiki/Liste_der_L%C3%A4nder_Europas</a>                                                                                                                                                   |
| forest area:             | <a href="https://de.wikipedia.org/wiki/Liste_der_L%C3%A4nder_nach_Waldfl%C3%A4che">https://de.wikipedia.org/wiki/Liste_der_L%C3%A4nder_nach_Waldfl%C3%A4che</a>                                                                                                                         |
| population size:         | <a href="https://de.wikipedia.org/wiki/Liste_der_L%C3%A4nder_Europas">https://de.wikipedia.org/wiki/Liste_der_L%C3%A4nder_Europas</a>                                                                                                                                                   |
| GDP:                     | <a href="https://de.wikipedia.org/wiki/Liste_der_L%C3%A4nder_Europas_(status:_2016)">https://de.wikipedia.org/wiki/Liste_der_L%C3%A4nder_Europas_(status:_2016)</a>                                                                                                                     |
| EU accession:            | <a href="https://www.google.com/publicdata/explore?ds=d5bncppjof8f9_&amp;met_y=ny_gdp_pcip_cd&amp;hl=de&amp;dl=de">https://www.google.com/publicdata/explore?ds=d5bncppjof8f9_&amp;met_y=ny_gdp_pcip_cd&amp;hl=de&amp;dl=de</a> (status: Andorra 2016, Liechtenstein 2015, Monaco 2011) |
| EU accession:            | <a href="https://de.wikipedia.org/wiki/Mitgliedstaaten_der_Europ%C3%A4ischen_Union">https://de.wikipedia.org/wiki/Mitgliedstaaten_der_Europ%C3%A4ischen_Union</a>                                                                                                                       |
| coast line:              | <a href="https://de.wikipedia.org/wiki/Liste_der_L%C3%A4nder_nach_K%C3%BCstl%C3%A4nge">https://de.wikipedia.org/wiki/Liste_der_L%C3%A4nder_nach_K%C3%BCstl%C3%A4nge</a>                                                                                                                 |
| agricultural area:       | <a href="https://de.wikipedia.org/wiki/Liste_der_L%C3%A4nder_nach_Landwirtschaftlicher_Nutzfl%C3%A4che">https://de.wikipedia.org/wiki/Liste_der_L%C3%A4nder_nach_Landwirtschaftlicher_Nutzfl%C3%A4che</a>                                                                               |
| boarder length:          | <a href="https://en.wikipedia.org/wiki/List_of_countries_and_territories_by_land_borders">https://en.wikipedia.org/wiki/List_of_countries_and_territories_by_land_borders</a>                                                                                                           |
| coordinates:             | <a href="https://www.cia.gov/library/publications/resources/the-world-factbook/geos/au.html">https://www.cia.gov/library/publications/resources/the-world-factbook/geos/au.html</a>                                                                                                     |
| biogeographical regions: | <a href="https://de.wikipedia.org/wiki/Biogeographische_Regionen_der_Europ%C3%A4ischen_Union">https://de.wikipedia.org/wiki/Biogeographische_Regionen_der_Europ%C3%A4ischen_Union</a>                                                                                                   |

**Appendix S1. Socio economic and geographic country characteristics to test the hypotheses and sources of information attached.**

**Appendix S2/1. Binary coded analysis outcome for ecosystem diversity indicator choice in the European national CBD reports.**

| 1. Ecosystem indicators |              |              |       |                      |            |                    |              |        |                       |                |                       |                    |                 |              |               |       |           |  |
|-------------------------|--------------|--------------|-------|----------------------|------------|--------------------|--------------|--------|-----------------------|----------------|-----------------------|--------------------|-----------------|--------------|---------------|-------|-----------|--|
| country                 | 1a) land use |              |       | 1b) forest structure |            |                    |              |        | 1c) nature protection |                |                       | 1d) human pressure |                 |              |               |       |           |  |
|                         | forestral    | agricultural | urban | deadwood             | old stands | forest communities | regeneration | glades | FFH status            | protected area | protection activities | environm. load     | hunting/fishery | wood removal | fragmentation | waste | awareness |  |
| Albania                 | 1            | 1            |       |                      | 1          |                    |              |        |                       | 1              | 1                     |                    |                 |              |               |       |           |  |
| Andorra                 |              |              | 1     |                      |            |                    |              |        |                       | 1              | 1                     | 1                  |                 |              |               |       |           |  |
| Austria                 | 1            | 1            | 1     |                      |            | 1                  |              |        | 1                     | 1              | 1                     | 1                  | 1               |              | 1             | 1     | 1         |  |
| Belgium                 | 1            |              |       |                      |            |                    |              |        | 1                     | 1              | 1                     |                    |                 |              | 1             |       | 1         |  |
| Bosnia                  | 1            |              |       |                      |            |                    |              |        |                       | 1              | 1                     |                    |                 |              |               | 1     | 1         |  |
| Bulgaria                | 1            | 1            | 1     |                      |            | 1                  | 1            |        |                       | 1              | 1                     | 1                  | 1               |              |               | 1     |           |  |
| Croatia                 | 1            | 1            | 1     |                      |            | 1                  |              |        |                       | 1              | 1                     | 1                  | 1               |              |               |       | 1         |  |
| Cyprus                  | 1            |              |       |                      |            | 1                  |              |        | 1                     | 1              | 1                     |                    |                 |              |               |       |           |  |
| Czech Republic          | 1            | 1            | 1     |                      |            | 1                  | 1            |        | 1                     | 1              | 1                     | 1                  | 1               | 1            |               |       |           |  |
| Denmark                 | 1            | 1            | 1     |                      |            | 1                  |              |        | 1                     | 1              | 1                     | 1                  | 1               |              |               |       |           |  |
| Estonia                 | 1            | 1            |       |                      |            | 1                  |              |        | 1                     | 1              | 1                     | 1                  | 1               | 1            | 1             | 1     |           |  |
| Finland                 | 1            | 1            | 1     |                      | 1          | 1                  | 1            | 1      | 1                     | 1              | 1                     | 1                  | 1               | 1            | 1             | 1     | 1         |  |
| France                  | 1            | 1            | 1     | 1                    |            | 1                  |              |        | 1                     | 1              | 1                     | 1                  | 1               |              | 1             | 1     | 1         |  |
| Germany                 | 1            | 1            | 1     | 1                    |            | 1                  | 1            |        | 1                     | 1              | 1                     | 1                  | 1               |              | 1             |       | 1         |  |
| Greece                  | 1            | 1            | 1     |                      |            | 1                  |              |        | 1                     | 1              | 1                     |                    |                 |              | 1             | 1     | 1         |  |
| Hungary                 | 1            | 1            | 1     | 1                    |            | 1                  |              |        | 1                     | 1              | 1                     | 1                  | 1               |              | 1             |       | 1         |  |
| Ireland                 | 1            | 1            | 1     |                      |            | 1                  | 1            |        | 1                     | 1              | 1                     | 1                  | 1               | 1            | 1             | 1     | 1         |  |
| Italy                   | 1            | 1            | 1     |                      |            |                    |              |        | 1                     | 1              | 1                     | 1                  | 1               | 1            |               |       |           |  |
| Latvia                  | 1            | 1            |       |                      | 1          |                    |              |        | 1                     | 1              | 1                     |                    |                 |              |               |       |           |  |
| Liechtenstein           | 1            | 1            | 1     | 1                    | 1          |                    | 1            | 1      | 1                     | 1              | 1                     | 1                  | 1               |              |               | 1     |           |  |
| Lithuania               | 1            | 1            | 1     |                      |            | 1                  |              |        | 1                     | 1              | 1                     | 1                  | 1               | 1            |               | 1     | 1         |  |
| Luxembourg              |              |              | 1     |                      |            |                    |              |        | 1                     | 1              | 1                     | 1                  |                 |              | 1             |       |           |  |
| Macedonia               | 1            | 1            |       |                      |            | 1                  |              |        |                       | 1              | 1                     |                    |                 |              | 1             |       |           |  |
| Malta                   | 1            | 1            | 1     |                      |            | 1                  |              |        | 1                     | 1              | 1                     | 1                  |                 |              |               | 1     | 1         |  |
| Moldava                 |              | 1            |       |                      |            |                    |              |        |                       | 1              |                       |                    | 1               | 1            |               |       |           |  |
| Monaco                  | 1            |              | 1     |                      |            |                    |              |        |                       | 1              | 1                     |                    | 1               |              |               | 1     |           |  |
| Montenegro              | 1            |              |       |                      |            |                    |              |        |                       | 1              |                       | 1                  | 1               |              | 1             |       |           |  |
| Norway                  | 1            | 1            | 1     |                      |            | 1                  |              |        |                       | 1              | 1                     | 1                  | 1               |              |               |       | 1         |  |
| Poland                  | 1            | 1            | 1     | 1                    | 1          | 1                  |              |        | 1                     | 1              | 1                     | 1                  | 1               |              | 1             | 1     | 1         |  |
| Portugal                | 1            |              |       |                      |            | 1                  |              |        | 1                     | 1              | 1                     |                    |                 |              | 1             |       |           |  |
| Romania                 | 1            | 1            | 1     |                      |            |                    |              |        | 1                     | 1              | 1                     | 1                  |                 |              |               | 1     |           |  |
| San Marino              | 1            | 1            | 1     |                      |            |                    |              |        |                       | 1              | 1                     |                    | 1               |              | 1             |       |           |  |
| Serbia                  | 1            | 1            | 1     | 1                    |            | 1                  | 1            |        |                       | 1              | 1                     | 1                  | 1               |              | 1             | 1     |           |  |
| Slovakia                | 1            | 1            | 1     |                      | 1          | 1                  | 1            |        | 1                     | 1              | 1                     | 1                  |                 |              | 1             | 1     |           |  |
| Slovenia                | 1            |              | 1     |                      |            |                    |              |        | 1                     | 1              | 1                     | 1                  |                 |              | 1             | 1     | 1         |  |
| Spain                   |              |              | 1     |                      |            |                    |              |        | 1                     | 1              | 1                     | 1                  |                 |              |               |       |           |  |
| Sweden                  | 1            |              | 1     | 1                    | 1          | 1                  |              |        | 1                     | 1              | 1                     |                    |                 | 1            |               |       |           |  |
| Switzerland             | 1            | 1            | 1     | 1                    |            | 1                  | 1            |        | 1                     | 1              | 1                     | 1                  | 1               | 1            |               |       | 1         |  |
| The Netherlands         | 1            | 1            |       |                      |            |                    |              |        | 1                     | 1              | 1                     | 1                  | 1               | 1            | 1             | 1     | 1         |  |
| Turkey                  | 1            | 1            |       |                      |            | 1                  |              |        |                       | 1              |                       |                    |                 |              |               |       |           |  |
| United Kingdom          |              |              |       |                      |            |                    | 1            |        | 1                     | 1              | 1                     | 1                  | 1               |              | 1             | 1     | 1         |  |
| Ukraine                 | 1            | 1            | 1     |                      |            | 1                  | 1            |        | 1                     | 1              | 1                     | 1                  | 1               | 1            | 1             | 1     | 1         |  |
| Sum                     | 37           | 31           | 29    | 8                    | 7          | 25                 | 10           | 2      | 27                    | 41             | 39                    | 28                 | 24              | 16           | 22            | 19    | 18        |  |

Appendix S2/2. Binary coded analysis outcome for species diversity indicator choice in the European national CBD reports.

| 2. Species indicators |                     |      |        |                                     |         |               |          |       |       |                       |         |      |                                    |         |          |            |
|-----------------------|---------------------|------|--------|-------------------------------------|---------|---------------|----------|-------|-------|-----------------------|---------|------|------------------------------------|---------|----------|------------|
| country               | 2a) aquatic species |      |        | 2b) semiaquatic-terrestrial species |         |               |          |       |       | 2c) terrestrial flora |         |      | 2d) species of particular interest |         |          |            |
|                       | benthos             | fish | plants | amphib./reptiles                    | mammals | invertebrates | protozoa | fungi | birds | butterflies           | lichens | moss | vascular plants                    | exotics | endemics | red listed |
| Albania               |                     | 1    |        | 1                                   | 1       | 1             |          |       | 1     |                       |         |      | 1                                  |         | 1        | 1          |
| Andorra               |                     |      |        |                                     |         |               |          |       |       |                       |         |      |                                    |         |          |            |
| Austria               | 1                   |      |        |                                     |         |               |          | 1     | 1     |                       |         |      | 1                                  | 1       |          |            |
| Belgium               |                     | 1    | 1      | 1                                   | 1       | 1             |          |       | 1     | 1                     |         |      | 1                                  | 1       |          | 1          |
| Bosnia                |                     | 1    |        | 1                                   | 1       | 1             |          |       | 1     |                       |         |      | 1                                  | 1       |          | 1          |
| Bulgaria              | 1                   | 1    | 1      | 1                                   | 1       | 1             | 1        | 1     | 1     | 1                     | 1       |      | 1                                  | 1       | 1        | 1          |
| Croatia               | 1                   | 1    | 1      | 1                                   | 1       | 1             |          | 1     | 1     | 1                     | 1       | 1    | 1                                  | 1       | 1        | 1          |
| Cyprus                |                     | 1    |        | 1                                   | 1       |               |          |       | 1     |                       |         |      | 1                                  |         | 1        |            |
| Czech Republic        |                     | 1    |        | 1                                   | 1       | 1             | 1        | 1     | 1     | 1                     | 1       | 1    | 1                                  | 1       |          |            |
| Denmark               |                     | 1    | 1      | 1                                   | 1       | 1             |          | 1     | 1     | 1                     | 1       |      | 1                                  | 1       |          | 1          |
| Estonia               | 1                   | 1    | 1      |                                     | 1       | 1             |          |       | 1     |                       |         |      | 1                                  | 1       |          |            |
| Finland               | 1                   | 1    | 1      | 1                                   | 1       | 1             |          | 1     | 1     | 1                     | 1       | 1    | 1                                  | 1       | 1        | 1          |
| France                |                     | 1    |        | 1                                   | 1       | 1             |          | 1     | 1     | 1                     | 1       |      | 1                                  | 1       | 1        | 1          |
| Germany               |                     | 1    |        |                                     |         | 1             |          |       | 1     |                       |         | 1    | 1                                  | 1       | 1        | 1          |
| Greece                | 1                   | 1    | 1      | 1                                   | 1       | 1             |          | 1     | 1     | 1                     |         |      | 1                                  | 1       | 1        | 1          |
| Hungary               |                     | 1    |        |                                     |         |               |          | 1     | 1     |                       | 1       |      | 1                                  | 1       | 1        | 1          |
| Ireland               |                     | 1    | 1      | 1                                   | 1       | 1             |          | 1     | 1     | 1                     | 1       | 1    | 1                                  | 1       | 1        | 1          |
| Italy                 |                     | 1    | 1      | 1                                   | 1       | 1             | 1        | 1     | 1     | 1                     | 1       | 1    | 1                                  | 1       |          | 1          |
| Latvia                |                     | 1    | 1      | 1                                   | 1       | 1             |          | 1     | 1     |                       | 1       | 1    | 1                                  | 1       |          |            |
| Liechtenstein         | 1                   | 1    | 1      | 1                                   | 1       | 1             |          | 1     | 1     |                       |         |      | 1                                  | 1       |          | 1          |
| Lithuania             |                     | 1    | 1      | 1                                   | 1       | 1             |          | 1     | 1     |                       | 1       | 1    | 1                                  | 1       |          | 1          |
| Luxembourg            |                     | 1    |        | 1                                   | 1       |               |          |       | 1     | 1                     |         |      | 1                                  |         |          | 1          |
| Macedonia             |                     | 1    | 1      | 1                                   | 1       | 1             |          | 1     | 1     | 1                     |         |      | 1                                  |         | 1        |            |
| Malta                 | 1                   | 1    | 1      | 1                                   | 1       | 1             |          | 1     | 1     | 1                     | 1       | 1    | 1                                  | 1       | 1        | 1          |
| Moldava               |                     | 1    | 1      | 1                                   | 1       | 1             |          | 1     |       | 1                     | 1       |      | 1                                  |         | 1        |            |
| Monaco                | 1                   | 1    | 1      | 1                                   |         | 1             |          |       | 1     |                       |         |      | 1                                  | 1       | 1        | 1          |
| Montenegro            |                     | 1    | 1      | 1                                   | 1       | 1             |          | 1     | 1     |                       | 1       |      | 1                                  |         |          |            |
| Norway                | 1                   | 1    | 1      | 1                                   | 1       | 1             |          | 1     | 1     |                       | 1       | 1    | 1                                  | 1       |          | 1          |
| Poland                |                     | 1    | 1      | 1                                   | 1       | 1             |          | 1     | 1     |                       | 1       | 1    | 1                                  | 1       |          | 1          |
| Portugal              |                     | 1    |        | 1                                   | 1       | 1             |          |       | 1     |                       | 1       | 1    | 1                                  | 1       | 1        | 1          |
| Romania               | 1                   | 1    | 1      | 1                                   | 1       | 1             |          |       | 1     |                       | 1       | 1    | 1                                  | 1       |          | 1          |
| San Marino            |                     | 1    |        | 1                                   | 1       |               |          |       | 1     |                       |         |      | 1                                  |         | 1        | 1          |
| Serbia                | 1                   | 1    | 1      | 1                                   | 1       | 1             |          | 1     | 1     |                       | 1       | 1    | 1                                  |         |          |            |
| Slovakia              |                     | 1    | 1      | 1                                   | 1       | 1             | 1        |       | 1     | 1                     | 1       |      | 1                                  |         |          | 1          |
| Slovenia              |                     | 1    |        | 1                                   | 1       | 1             |          |       | 1     | 1                     |         |      |                                    | 1       | 1        |            |
| Spain                 | 1                   | 1    | 1      | 1                                   | 1       | 1             |          | 1     | 1     |                       |         | 1    | 1                                  | 1       | 1        | 1          |
| Sweden                |                     |      |        |                                     |         |               |          |       |       |                       |         |      |                                    | 1       |          | 1          |
| Switzerland           |                     | 1    | 1      | 1                                   | 1       | 1             |          | 1     | 1     | 1                     | 1       | 1    | 1                                  | 1       | 1        | 1          |
| The Netherlands       |                     | 1    | 1      |                                     | 1       | 1             |          |       | 1     | 1                     |         |      | 1                                  | 1       | 1        | 1          |
| Turkey                | 1                   | 1    |        | 1                                   | 1       | 1             |          |       | 1     |                       |         |      | 1                                  |         | 1        | 1          |
| United Kingdom        | 1                   | 1    | 1      | 1                                   | 1       |               |          | 1     | 1     | 1                     | 1       | 1    | 1                                  | 1       | 1        | 1          |
| Ukraine               |                     |      | 1      |                                     | 1       |               |          |       | 1     |                       | 1       | 1    | 1                                  | 1       |          | 1          |
| Sum                   | 15                  | 38   | 27     | 35                                  | 36      | 32            | 4        | 23    | 38    | 17                    | 24      | 23   | 39                                 | 32      | 23       | 30         |

Appendix S2/3. Binary-coded analysis outcome for genetic diversity indicator choice in the European national CBD reports.

| country         | 3. Genetic indicators   |         |                 |         |             |                 |         |                          |         |                  |         |   |
|-----------------|-------------------------|---------|-----------------|---------|-------------|-----------------|---------|--------------------------|---------|------------------|---------|---|
|                 | 3a) domesticated plants |         | 3b) wild plants |         |             |                 |         | 3c) domesticated animals |         | 3d) wild animals |         |   |
|                 | in-situ                 | ex-situ | in-situ         | ex-situ | game impact | genetic reserve | forests | in-situ                  | ex-situ | in-situ          | ex-situ |   |
| Albania         |                         |         |                 |         |             |                 |         |                          |         |                  | 1       |   |
| Andorra         |                         |         |                 |         |             |                 |         |                          |         |                  |         |   |
| Austria         |                         | 1       | 1               | 1       | 1           | 1               | 1       |                          |         |                  | 1       |   |
| Belgium         | 1                       | 1       |                 |         |             |                 |         | 1                        | 1       |                  |         |   |
| Bosnia          |                         | 1       |                 | 1       |             |                 |         |                          |         |                  | 1       |   |
| Bulgaria        | 1                       | 1       | 1               | 1       | 1           |                 | 1       | 1                        | 1       |                  |         | 1 |
| Croatia         |                         |         | 1               | 1       |             |                 | 1       | 1                        | 1       |                  | 1       | 1 |
| Cyprus          |                         | 1       | 1               |         |             |                 |         |                          |         | 1                |         |   |
| Czech Republic  |                         | 1       | 1               | 1       | 1           | 1               |         | 1                        | 1       | 1                | 1       | 1 |
| Denmark         | 1                       | 1       | 1               | 1       |             |                 | 1       | 1                        | 1       |                  |         |   |
| Estonia         | 1                       | 1       |                 |         |             |                 |         | 1                        |         |                  | 1       | 1 |
| Finland         | 1                       | 1       | 1               | 1       |             |                 |         | 1                        | 1       | 1                | 1       | 1 |
| France          | 1                       | 1       |                 | 1       |             |                 |         | 1                        | 1       | 1                |         | 1 |
| Germany         | 1                       | 1       | 1               | 1       |             |                 |         | 1                        | 1       | 1                | 1       |   |
| Greece          | 1                       | 1       | 1               | 1       |             |                 | 1       | 1                        | 1       | 1                | 1       | 1 |
| Hungary         | 1                       | 1       | 1               | 1       |             |                 |         | 1                        | 1       | 1                |         |   |
| Ireland         |                         |         | 1               | 1       |             |                 |         | 1                        |         |                  | 1       | 1 |
| Italy           |                         |         | 1               |         |             |                 |         | 1                        |         |                  | 1       |   |
| Latvia          | 1                       | 1       | 1               | 1       |             |                 |         | 1                        |         |                  | 1       | 1 |
| Liechtenstein   | 1                       | 1       | 1               | 1       | 1           |                 |         |                          |         |                  | 1       |   |
| Lithuania       |                         | 1       | 1               | 1       |             |                 | 1       | 1                        | 1       | 1                | 1       | 1 |
| Luxembourg      | 1                       |         |                 |         |             |                 |         |                          |         |                  | 1       |   |
| Macedonia       |                         |         |                 | 1       |             |                 |         |                          |         | 1                | 1       | 1 |
| Malta           | 1                       |         | 1               |         |             |                 |         | 1                        |         | 1                | 1       |   |
| Moldava         |                         |         |                 |         |             |                 |         |                          |         |                  |         |   |
| Monaco          |                         |         | 1               |         |             |                 |         |                          |         |                  |         |   |
| Montenegro      |                         |         |                 |         |             |                 |         |                          |         |                  |         |   |
| Norway          |                         | 1       | 1               | 1       |             |                 |         | 1                        |         |                  | 1       | 1 |
| Poland          | 1                       | 1       | 1               | 1       |             |                 | 1       | 1                        | 1       |                  | 1       |   |
| Portugal        | 1                       | 1       | 1               | 1       |             |                 |         |                          |         |                  | 1       | 1 |
| Romania         |                         | 1       |                 |         |             |                 |         | 1                        |         |                  | 1       |   |
| San Marino      |                         |         |                 |         |             |                 |         |                          |         |                  |         |   |
| Serbia          | 1                       | 1       | 1               |         |             |                 |         |                          |         |                  | 1       | 1 |
| Slovakia        | 1                       | 1       | 1               | 1       |             |                 |         |                          |         |                  | 1       | 1 |
| Slovenia        |                         |         |                 |         |             |                 |         |                          |         |                  | 1       |   |
| Spain           | 1                       | 1       |                 | 1       |             |                 | 1       | 1                        |         | 1                |         | 1 |
| Sweden          | 1                       | 1       | 1               | 1       |             |                 | 1       | 1                        |         |                  | 1       |   |
| Switzerland     | 1                       | 1       |                 | 1       | 1           |                 | 1       | 1                        | 1       | 1                | 1       | 1 |
| The Netherlands | 1                       | 1       |                 |         |             |                 |         | 1                        |         |                  |         |   |
| Turkey          | 1                       | 1       | 1               | 1       |             |                 | 1       | 1                        |         |                  | 1       |   |
| United Kingdom  |                         | 1       | 1               | 1       |             |                 |         | 1                        |         |                  | 1       |   |
| Ukraine         |                         | 1       | 1               | 1       |             |                 | 1       | 1                        |         |                  | 1       | 1 |
| Sum             | 22                      | 29      | 26              | 26      | 5           |                 | 12      | 26                       | 16      | 29               | 19      |   |
